# Supplementary material
Source: MDPI journal article supplement (https://www.mdpi.com/2073-445X/5/4/45)
Supplement: s1 [file s1]

Supplementary

# Large-Scale Mapping of Tree-Community Composition as a Surrogate of Forest Degradation in Bornean Tropical Rain Forests

Shogoro Fujiki <sup>1,\*</sup>, Ryota Aoyagi <sup>1</sup>, Atsushi Tanaka <sup>1,2</sup>, Nobuo Imai <sup>1,3</sup>, Arif Data Kusma <sup>4</sup>, Yuyun Kurniawan <sup>5</sup>, Ying Fah Lee <sup>6</sup>, John Baptist Sugau <sup>6</sup>, Joan T. Pereira <sup>6</sup>, Hiromitsu Samejima <sup>7</sup> and Kanehiro Kitayama <sup>1</sup>

<sup>1</sup> Graduate School of Agriculture, Kyoto University, Kyoto 606-8502, Japan; aoyagi.ryota@gmail.com (R.A.); amcw2003@gmail.com (A.T.); i96nobuo@gmail.com (N.I.); kanehiro@kais.kyoto-u.ac.jp (K.K.)

<sup>2</sup> Japan Forest Technology Association, Tokyo, Japan

<sup>3</sup> Primate Research Institute, Kyoto University, Aichi, Japan

<sup>4</sup> WWF Indonesia, Kutai Barat, Kalimantan Timur, Indonesia; AKusuma@wwf.or.id

<sup>5</sup> WWF Indonesia, Ujung Kulon, Banten, Indonesia; YKurniawan@wwf.or.id

<sup>6</sup> Forest Research Centre, Sabah Forestry Department, 90715 Sandakan, Sabah, Malaysia; yingfah.lee@sabah.gov.my (Y.F.L.); john.sugau@sabah.gov.my (J.B.S.); Joan.pereira@sabah.gov.my (J.T.P.)

<sup>7</sup> Institute for Global Environmental Strategies, Kanagawa, Japan; lahang.lejau@gmail.com

\* Correspondence; fujiki5636@gmail.com; Tel.: +81-75-753-6080.

**Table S1.** Description of the Landsat imagery data set used in this study, including sensor, path / row and acquisition date.

| Name                               | Landsat Sensor | Worldwide Reference System (WRS) | Acquisition Date                                                             |
|------------------------------------|----------------|----------------------------------|------------------------------------------------------------------------------|
| Segaliud Lokan-Deramakot-Tangkulap | TM             | Path117/Row56                    | Aug/11/2009*                                                                 |
| Sapulut                            | OLI            | Path117/Row57                    | Jun/03/2013,<br>Jun/19/2013*                                                 |
| Roda Mas                           | OLI            | Path118/Row59                    | Oct/16/2013,<br>Feb/05/2014,<br>Sep/17/2014,<br>Mar/28/2015,<br>May/31/2015* |
| Ratah                              | TM             | Path117/Row60<br>Path118/Row60   | Aug/11/2009<br>Feb/10/2010*                                                  |

\*Used as a base image

**Table S2.** Variance inflation factor (VIF) of the selected variable in the established multivariate regression models.

|                                          | VIF       |
|------------------------------------------|-----------|
| <b>SegaliudLokan-Deramakot-Tangkulap</b> |           |
| B7 <sub>TM</sub>                         | 1.428116  |
| GLCM_mean_NDVI                           | 1.725384  |
| GLCM_correlation_B3 <sub>TM</sub>        | 1.193337  |
| GLCM_mean_B1 <sub>TM</sub>               | 1.603258  |
| GLCM_homogeneity_B4 <sub>TM</sub>        | 1.108553  |
| <b>Sapulut</b>                           |           |
| B6 <sub>OLI</sub>                        | 1.659212  |
| GLCM_contrast_B3 <sub>OLI</sub>          | 1.044686  |
| B5 <sub>OLI</sub>                        | 1.609069  |
| GLCM_mean_B6 <sub>OLI</sub>              | 1.146012  |
| <b>Roda Mas</b>                          |           |
| B6 <sub>OLI</sub>                        | 5.371266  |
| SD_NDSI                                  | 4.820667  |
| SD_NDWI                                  | 36.564958 |
| SD_NDVI                                  | 62.127144 |
| B4 <sub>OLI</sub>                        | 10.092117 |
| <b>Ratah</b>                             |           |
| B7 <sub>TM</sub>                         | 6.705413  |
| B3 <sub>TM</sub>                         | 6.712582  |
| GLCM_dissimilarity_B4 <sub>TM</sub>      | 1.018423  |

Note: SD, standard deviation; GLCM, grey level co-occurrence matrix; NDVI, normalized difference vegetation index; NDSI, normalized difference soil index; NDWI, normalized difference water index.

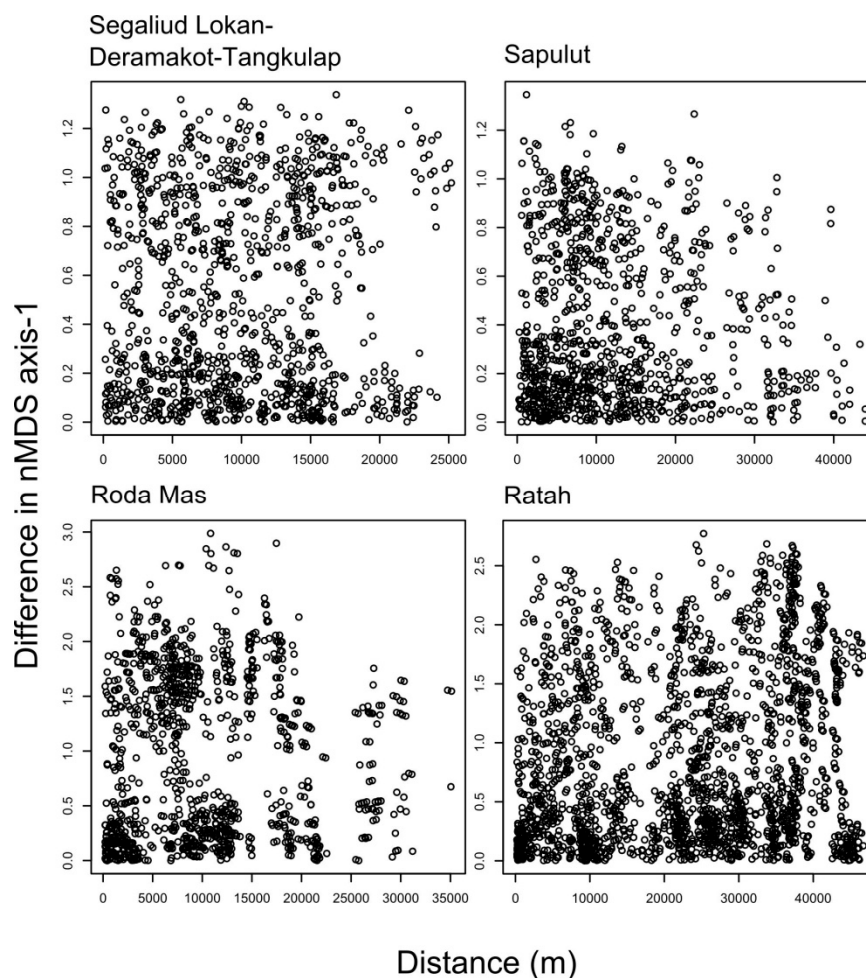

**Figure S1.** The effects of distance on the difference in the nMDS axis-1 scores of paired vegetation plots. See the main text for the details of the prediction model of nMDS axis-1 for each FMU. Positive relationships were observed for Ratah, potentially indicating the presence of spatial autocorrelations, but adjusted  $R^2$  scores were extremely low in all FMUs: SegaliudLokan-Deramakot-Tangkulap,  $R^2 = -0.00$ ,  $P > 0.05$ , n.s.; Sapulut,  $R^2 = 0.00$ ,  $P > 0.05$ , n.s.; Roda Mas,  $R^2 = 0.00$ ,  $P > 0.05$ , n.s.; Ratah,  $R^2 = 0.03$ ,  $P < 0.0001$ . n.s. denotes non-significance. Moreover, positive relationships may simply represent the consolidated occurrence of intact forests or disturbed forests.

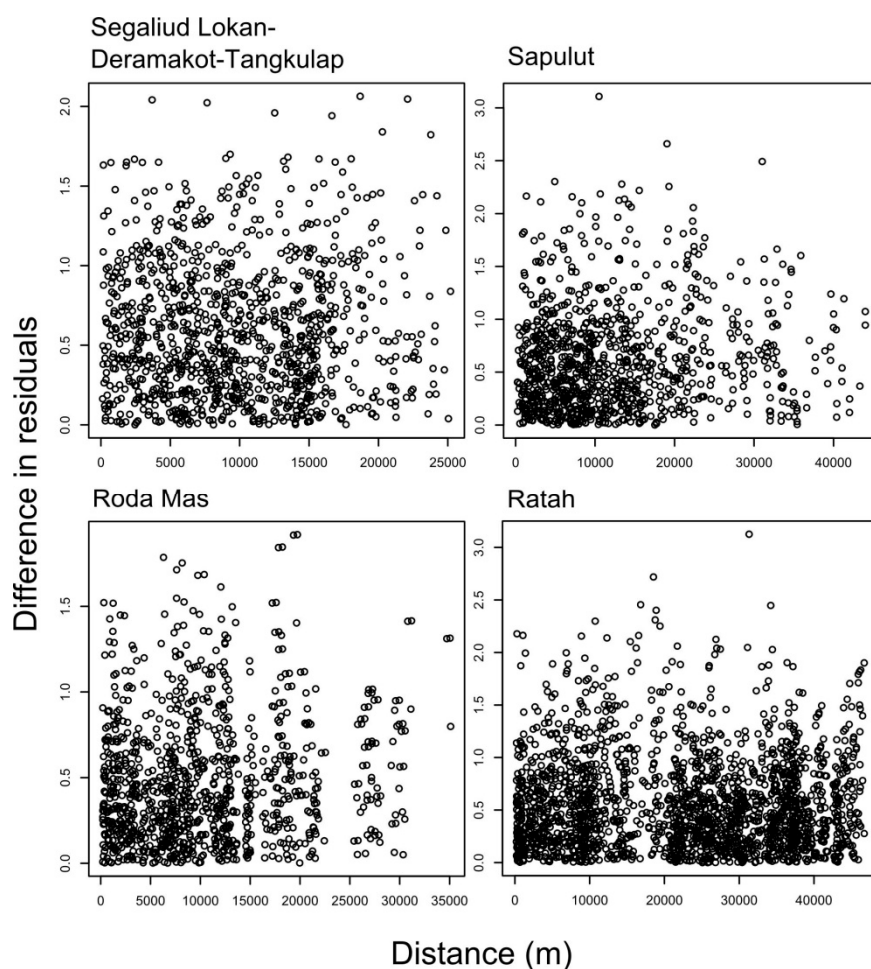

**Figure S2.** The effects of distance on the difference in the residuals of nMDS axis-1 (i.e. observed nMDS axis-1 – predicted nMDS axis-1) of paired vegetation plots. See the main text for the details of the prediction model of nMDS axis-1 for each FMU. Positive relationships were observed for two FMUs (Sapulut and Roda Mas), potentially indicating the presence of spatial autocorrelations, but adjusted  $R^2$  scores were extremely low in all FMUs: SegaliudLokan-Deramakot-Tangkulap,  $R^2 = -0.00$ ,  $P > 0.05$ , n.s.; Sapulut,  $R^2 = 0.01$ ,  $P < 0.001$ ; Roda Mas,  $R^2 = 0.01$ ,  $P < 0.0001$ ; Ratah,  $R^2 = 0.00$ ,  $P > 0.05$ , n.s. denotes non-significance. Moreover, positive relationships may simply represent the consolidated occurrence of intact forests or disturbed forests.

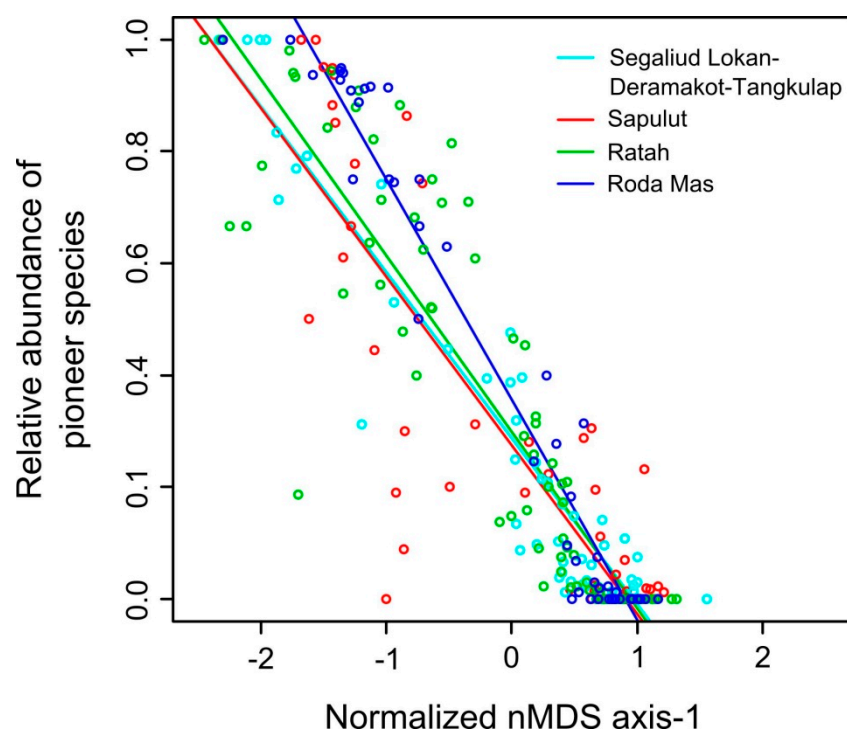

**Figure S3.** The relationships between the normalized nMDS axis-1 scores and relative abundance of pioneer species (genera) in each FMU. The adjusted  $R^2$  scores were significantly high in all FMUs: SegaliudLokan-Deramakot-Tangkulap,  $R^2 = 0.72$ ,  $P < 0.001$ ; Sapulut,  $R^2 = 0.90$ ,  $P < 0.001$ ; Roda Mas,  $R^2 = 0.95$ ,  $P < 0.001$ ; Ratah,  $R^2 = 0.82$ ,  $P < 0.001$ . There were no significant differences in the intercept and slope of regression lines among Segaliud Lokan (including Deramakot and Tangkulap), Ratah and Sapulut. The intercept and slope of Roda Mas were exceptionally significantly different from the other FMUs (intercept,  $P < 0.05$ ; slope,  $P < 0.001$ ), but the range of the deviation was still within that of the other FMUs.
